# Supplementary material
Source: PubMed Central journal article supplement (PMC3322820)

A

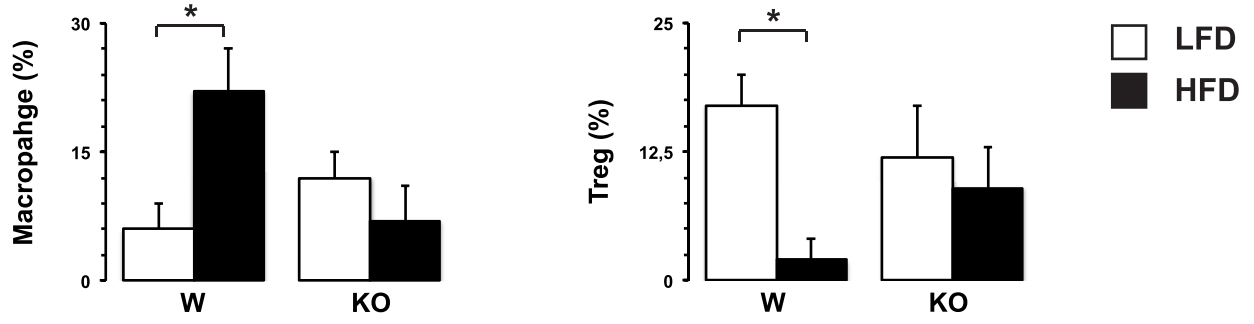

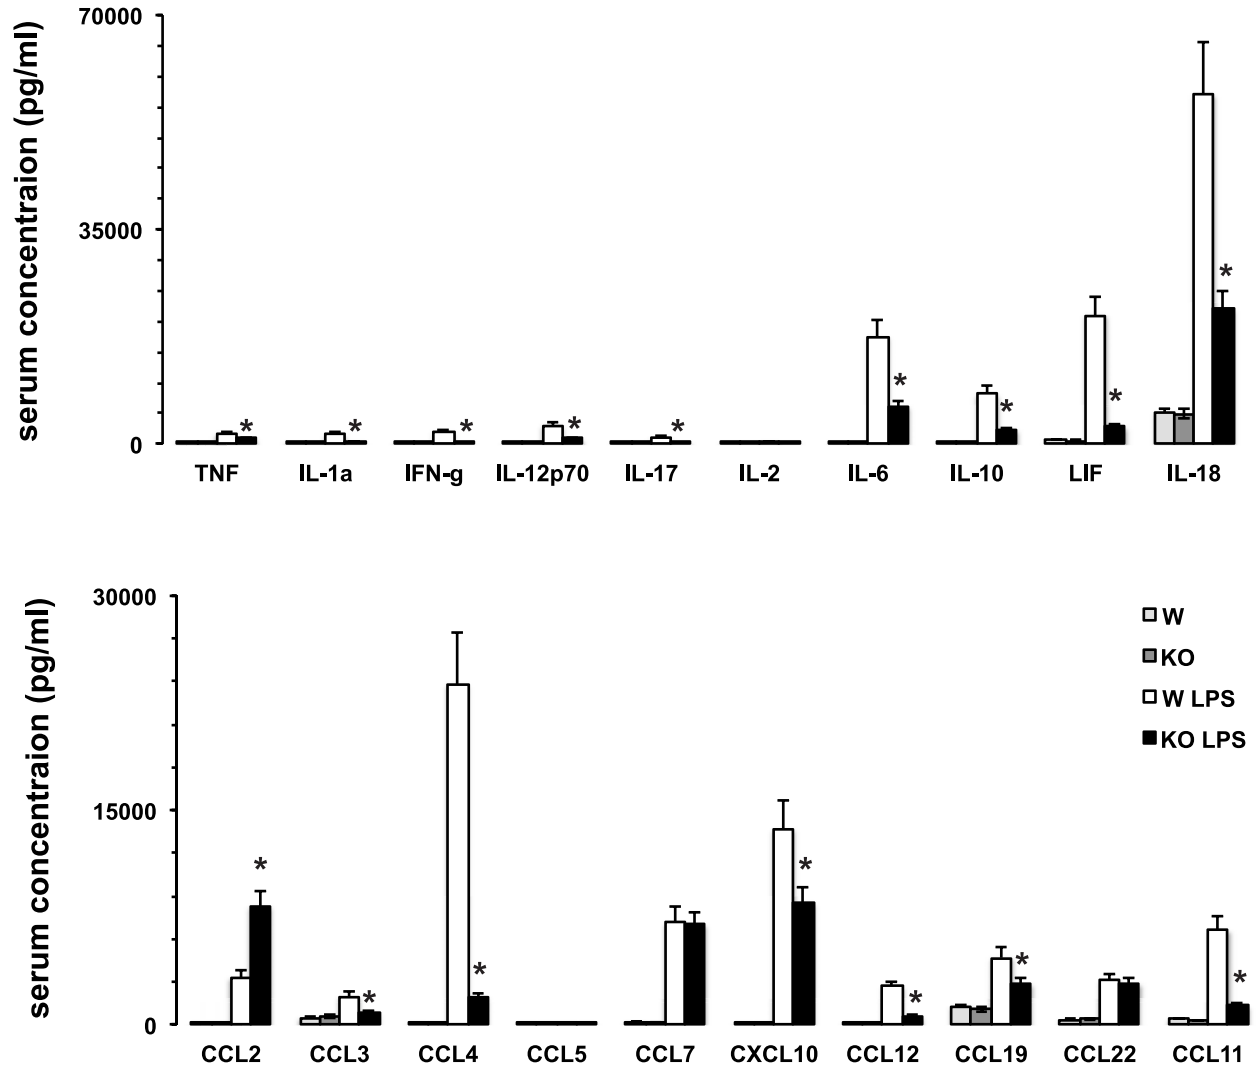

Supp. Figure 2

A

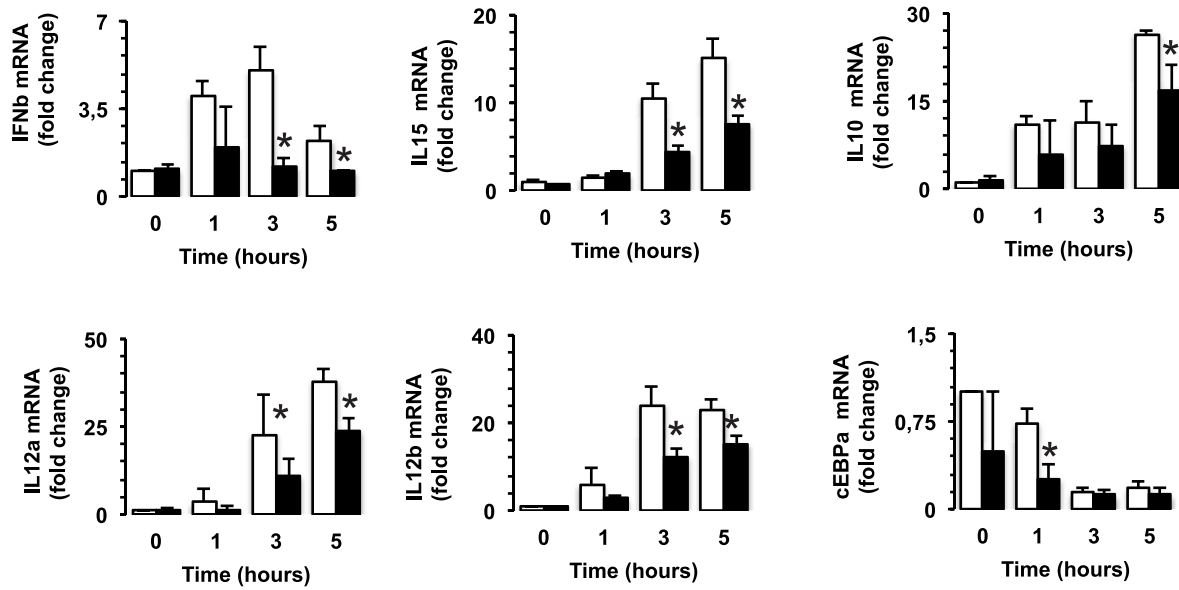

B

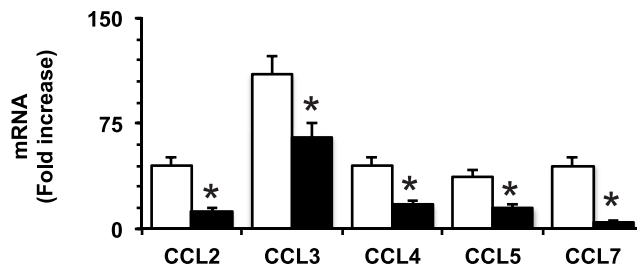

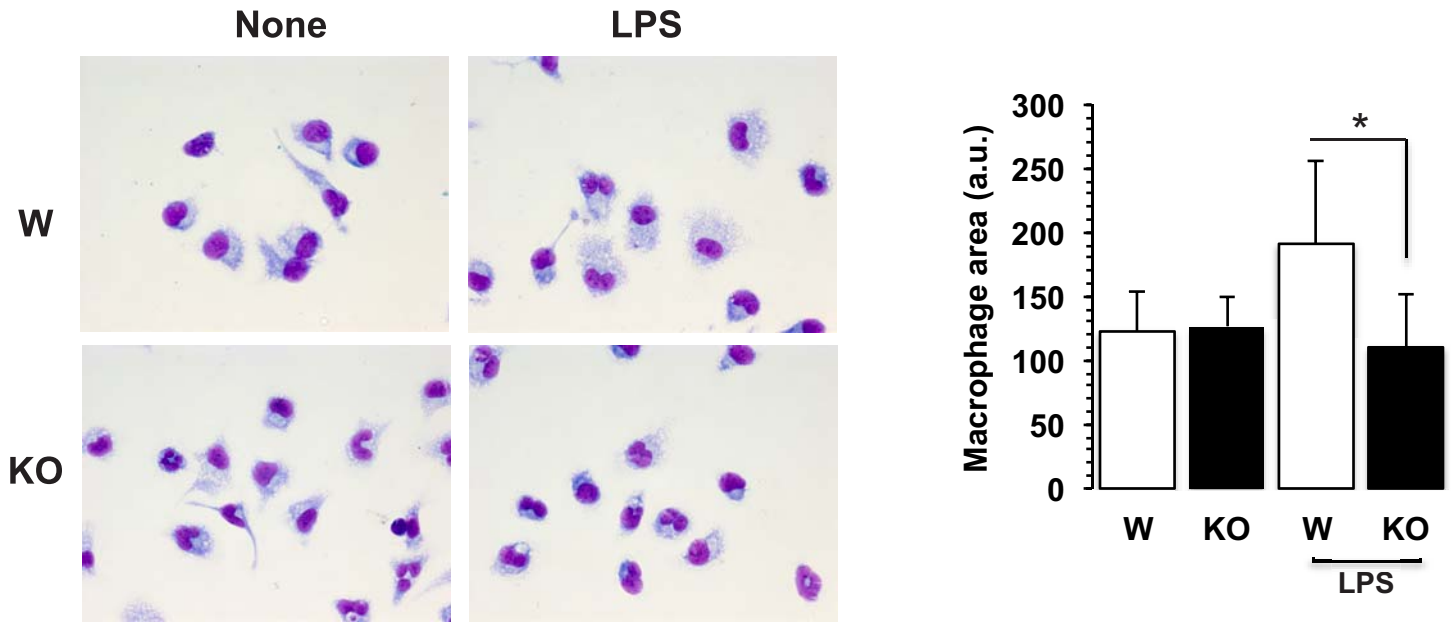

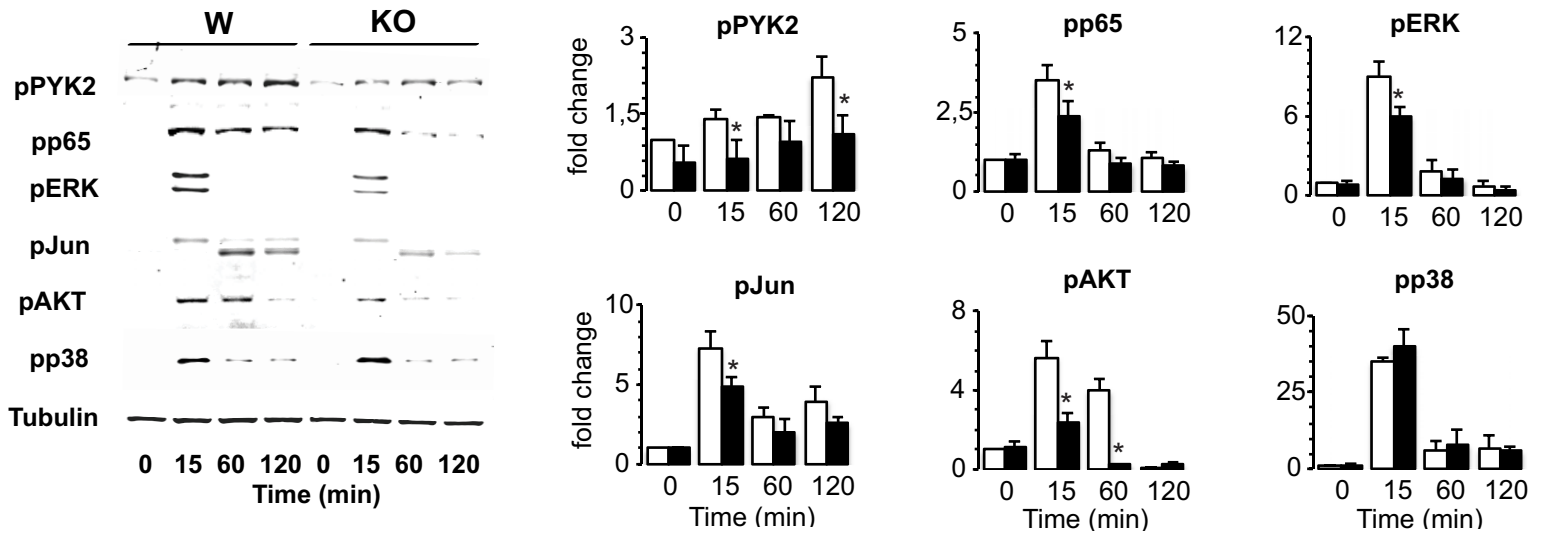

Supp. Figure 5

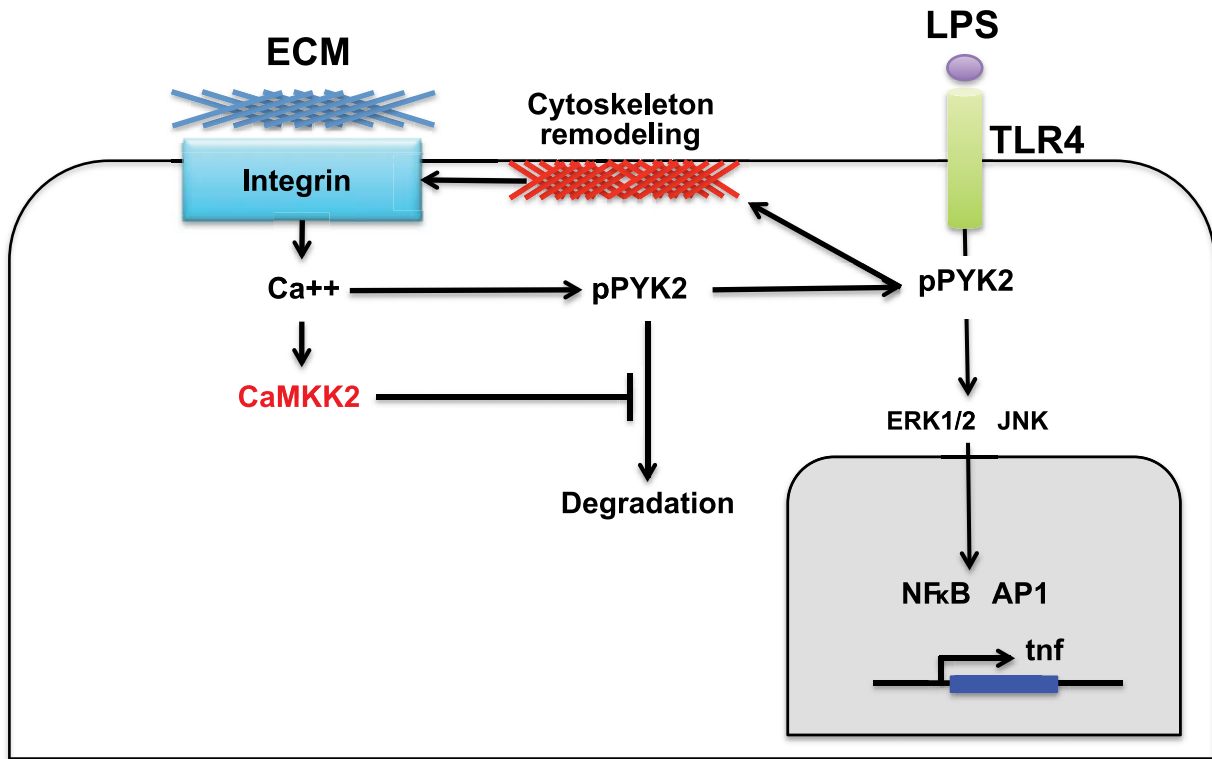

Supplement: supp_M111.336032_jbc.M111.336032-1.pdf [file supp_M111.336032_jbc.M111.336032-1.pdf]
